# Supplementary material
Source: PubMed Central journal article supplement (PMC1456864)

Supplemental Figure 2

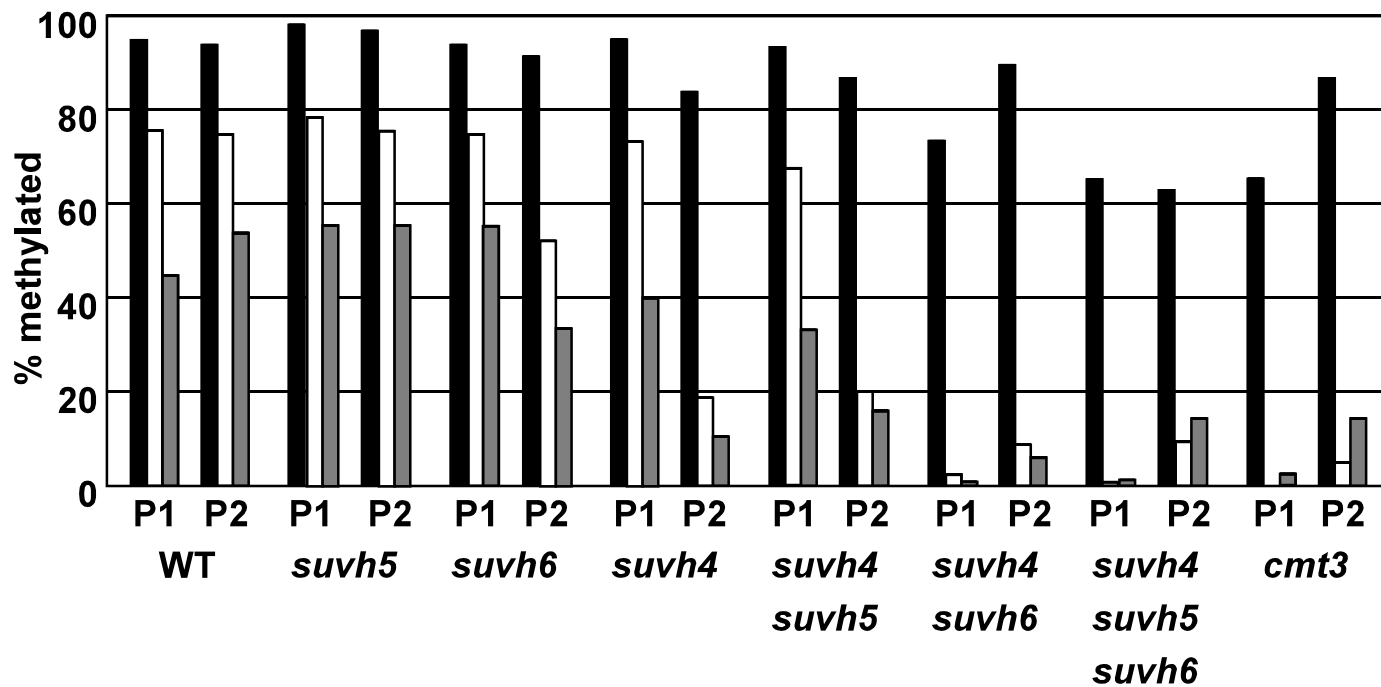

Supplement: plntcell_tpc.106.041400_2.pdf [file plntcell_tpc.106.041400_2.pdf]
